# Supplementary material for: The safety attitudes questionnaire – ambulatory version: psychometric properties of the Norwegian version for nursing homes
Source: PubMed Central journal article supplement (PMC6593577; doi:10.1186/s12913-019-4244-5), 2019-06-25
Supplement: 12913_2019_4244_MOESM1_ESM.pdf [file 12913_2019_4244_MOESM1_ESM.pdf]

Please answer by marking the response of your choice to the right of each item, using the letter from the scale below.

| A                 | B                 | C       | D              | E              | X              |
|-------------------|-------------------|---------|----------------|----------------|----------------|
| Disagree Strongly | Disagree Slightly | Neutral | Agree Slightly | Agree Strongly | Not Applicable |

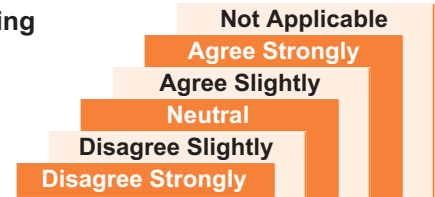

35. It is easy for personnel in this office to ask questions when there is something that they do not understand. (A B C D E X)
36. Disruptions in the continuity of care can be detrimental to patient safety. (A B C D E X)
37. During emergencies, I can predict what other personnel are going to do next. (A B C D E X)
38. The physicians and nurses here work together as a well-coordinated team. (A B C D E X)
39. I am frequently unable to express disagreement with staff physicians/intensivists in this office. (A B C D E X)
40. Truly professional personnel can leave personal problems behind when working. (A B C D E X)
41. Morale in this office is high. (A B C D E X)
42. Trainees in my discipline are adequately supervised. (A B C D E X)
43. I know the first and last names of all the personnel I worked with during my last shift. (A B C D E X)
44. I have made errors that had the potential to harm patients. (A B C D E X)
45. Attending physicians/primary care providers in this office are doing a good job. (A B C D E X)
46. All the personnel in this office take responsibility for patient safety. (A B C D E X)
47. I feel fatigued when I have to get up in the morning and face another day on the job. (A B C D E X)
48. Patient safety is constantly reinforced as the priority in this office. (A B C D E X)
49. I feel burned out from my work. (A B C D E X)
50. Important issues are well communicated at shift changes. (A B C D E X)
51. There is widespread adherence to clinical guidelines and evidence-based criteria in this office. (A B C D E X)
52. I feel frustrated by my job. (A B C D E X)
53. I feel I am working too hard on my job. (A B C D E X)
54. Information obtained through incident reports is used to make patient care safer in this office. (A B C D E X)
55. Personnel frequently disregard rules or guidelines (e.g., handwashing, treatment protocols/clinical pathways, sterile field, etc.) that are established for this office. (A B C D E X)
56. Fatigue impairs my performance during emergency situations (e.g. code or cardiac arrest). (A B C D E X)
57. Fatigue impairs my performance during routine care. (A B C D E X)
58. I am satisfied with the current referral process in this office. (A B C D E X)
59. There is adequate and timely transfer of patient information between the primary care physician and the specialist. (A B C D E X)
60. Medications are refilled in a timely manner. (A B C D E X)
61. Medications are refilled correctly. (A B C D E X)
62. Abnormal test results are frequently lost or overlooked. (A B C D E X)
63. Have you completed this survey before?  Yes  No  Don't Know

**BACKGROUND INFORMATION**

|                                                                                                                                                                                                                                                                                                                |                                                                                                                                                                                                                                                                                |                                                                                                                                                                                                                                                                                                                           |                                                                                                                                                             |                                                                                                                                      |                                                                                                   |
|----------------------------------------------------------------------------------------------------------------------------------------------------------------------------------------------------------------------------------------------------------------------------------------------------------------|--------------------------------------------------------------------------------------------------------------------------------------------------------------------------------------------------------------------------------------------------------------------------------|---------------------------------------------------------------------------------------------------------------------------------------------------------------------------------------------------------------------------------------------------------------------------------------------------------------------------|-------------------------------------------------------------------------------------------------------------------------------------------------------------|--------------------------------------------------------------------------------------------------------------------------------------|---------------------------------------------------------------------------------------------------|
| <b>Position: (mark your position)</b><br><input type="radio"/> Physicians<br><input type="radio"/> Registered Nurses<br><input type="radio"/> Nurse Managers<br><input type="radio"/> Residents<br><input type="radio"/> LVN<br><input type="radio"/> Radiologists<br><input type="radio"/> Medical Assistants |                                                                                                                                                                                                                                                                                | <input type="radio"/> Referral Coordinators<br><input type="radio"/> Physician Office Administrator<br><input type="radio"/> Office Managers<br><input type="radio"/> Business Office Manager<br><input type="radio"/> Receptionist<br><input type="radio"/> Radiology Technicians<br><input type="radio"/> Nutritionists | <b>How many years of experience do you have in this specialty?</b><br>YEARS<br>0 0<br>1 1<br>2 2<br>3 3<br>4 4<br>5 5<br>6 6<br>7 7<br>8 8<br>9 9           | <b>How many years have you worked at this office?</b><br>YEARS<br>0 0<br>1 1<br>2 2<br>3 3<br>4 4<br>5 5<br>6 6<br>7 7<br>8 8<br>9 9 | <b>CURRENT AGE</b><br>YEARS<br>0 0<br>1 1<br>2 2<br>3 3<br>4 4<br>5 5<br>6 6<br>7 7<br>8 8<br>9 9 |
| <b>Job Status</b><br><input type="radio"/> Full-time<br><input type="radio"/> Part-time<br><input type="radio"/> Agency<br><input type="radio"/> Contract                                                                                                                                                      | <b>Ethnic Group:</b><br><input type="radio"/> Hispanic<br><input type="radio"/> Black (not Hispanic)<br><input type="radio"/> White (not Hispanic)<br><input type="radio"/> Asian/Pacific Islander<br><input type="radio"/> Multi-ethnic<br><input type="radio"/> Other: _____ |                                                                                                                                                                                                                                                                                                                           | <b>Usual Shift</b><br><input type="radio"/> Days<br><input type="radio"/> Evenings<br><input type="radio"/> Nights<br><input type="radio"/> Variable Shifts |                                                                                                                                      |                                                                                                   |
| <b>Gender:</b><br><input type="radio"/> Male<br><input type="radio"/> Female                                                                                                                                                                                                                                   | *Optional* collected as part of a cross-cultural study<br>Citizenship (e.g., Canadian, Filipino, USA, etc.): _____                                                                                                                                                             |                                                                                                                                                                                                                                                                                                                           | Country of birth (if different): _____                                                                                                                      |                                                                                                                                      |                                                                                                   |

**COMMENTS: What are your top three recommendations for improving patient safety in this office?**

1 \_\_\_\_\_

2 \_\_\_\_\_

3 \_\_\_\_\_
